# Supplementary material
Source: publisher site journal article supplement (https://www.spandidos-publications.com/959/downloadSupplementary)
Supplement: Supplementary file 1 [file downloadSupplementary]

## Sheet: mRNA_mean
Table SII. DemRNA expression correlated with cervical cancer in different age groups
Symbol	Youth	Middle	Old
Time	20	40	60
A1BG	3.50742	3.524	3.41771
A1CF	1.6181	1.51125	1.85324
A2M	12.7001	12.8016	12.7177
A2ML1	10.2809	10.0959	10.7848
A3GALT2	2.7054	2.59941	2.62568
A4GALT	11.5294	11.1914	10.827
A4GNT	1.6793	1.72377	1.33933
AAAS	11.3431	11.2819	11.124
AACS	11.5615	11.5244	11.3865
AADAC	3.6044	3.59066	3.13351
AADACL2	1.73402	1.86845	2.10001
AADACL3	0.530413	0.325302	0.240178
AADACL4	0.267437	0.372695	0.347001
AADAT	6.67472	6.98618	6.92126
AAED1	9.39946	9.18043	8.94111
AAGAB	11.8841	11.7022	11.4536
AAK1	11.0807	11.0518	11.0038
AAMDC	9.40149	9.38401	9.24801
AAMP	12.5268	12.576	12.6597
AANAT	4.04065	4.00823	4.05137
AAR2	11.3801	11.3809	11.3002
AARD	2.04584	1.80291	1.82417
AARS	13.1518	13.2251	13.0779
AARS2	10.4971	10.4739	10.4386
AARSD1	8.09722	8.0418	7.9376
AASDH	9.19994	9.13518	9.08269
AASDHPPT	10.7429	10.5175	10.4649
AASS	7.40246	7.33452	7.64957
AATF	12.0146	11.995	11.8137
AATK	7.21052	7.07628	6.86675
AATK-AS1	0.603166	0.584051	0.615705
ABAT	8.94078	8.70955	8.79365
ABCA1	10.843	10.6352	10.5701
ABCA10	5.97093	5.77724	5.63459
ABCA12	8.64325	8.96851	8.85107
ABCA13	7.42518	7.84743	8.12246
ABCA2	11.0974	11.0745	11.1425
ABCA3	9.4107	9.75511	9.86283
ABCA4	5.43561	5.31472	4.79793
ABCA5	10.3189	10.2241	10.2332
ABCA6	5.62883	5.57485	5.23886
ABCA7	11.1518	11.0141	10.8553
ABCA8	4.45026	4.59907	4.94725
ABCA9	5.18666	5.00159	5.21668
ABCB1	6.83766	6.60944	6.60464
ABCB10	10.3579	10.2347	10.2583
ABCB11	2.39517	2.24272	1.73419
ABCB4	4.2831	4.52828	4.52722
ABCB5	1.38327	1.77368	1.45364
ABCB6	8.94005	8.96222	9.04538
ABCB7	10.037	10.1279	10.106
ABCB8	10.94	11.055	10.9805
ABCB9	8.83058	8.77516	8.68841
ABCC1	12.3102	12.2877	12.0062
ABCC10	10.622	10.4794	10.4825
ABCC11	4.18364	4.12006	3.83726
ABCC12	0.464762	0.407121	0.362497
ABCC2	5.31442	5.17179	4.90792
ABCC3	10.4659	10.5602	9.99217
ABCC4	9.14807	9.17635	9.02406
ABCC5	12.0695	12.2224	12.2831
ABCC6	6.40877	6.74137	6.59554
ABCC8	1.5066	1.99503	1.47721
ABCC9	5.83953	5.99318	5.78013
ABCD1	10.2094	10.2073	9.96288
ABCD2	4.96814	4.7734	4.81512
ABCD3	11.4461	11.38	11.3246
ABCD4	11.1002	10.9536	10.8066
ABCE1	12.0095	11.9072	11.883
ABCF1	12.7019	12.6127	12.4787
ABCF2	11.7138	11.7364	11.6746
ABCF3	12.1831	12.1752	12.1487
ABCG1	10.6997	10.5401	10.2348
ABCG2	6.30312	6.19655	6.13709
ABCG4	3.40553	3.34259	3.04249
ABCG5	2.40966	2.47991	2.61352
ABCG8	0.845142	1.09652	0.957442
ABHD1	4.15494	4.46189	4.62685
ABHD10	10.4611	10.6521	10.5979
ABHD11	10.7557	10.8951	10.9386
ABHD12	11.9371	12.1274	12.0204
ABHD12B	4.9551	4.72212	4.61263
ABHD13	10.0783	9.89308	9.79915
ABHD14A	8.64914	8.67379	8.6495
ABHD14A-ACY1	3.46213	3.27946	3.3505
ABHD14B	11.4008	11.3267	11.3794
ABHD15	9.86489	9.85467	9.68758
ABHD16A	8.65088	8.55236	8.44161
ABHD16B	0	0	0
ABHD17A	10.7756	10.7143	10.6623
ABHD17B	10.0035	9.92586	9.73154
ABHD17C	12.1084	11.7939	11.4251
ABHD2	12.3815	12.5106	12.0843
ABHD3	10.7138	10.6199	10.5631
ABHD4	11.2311	11.1513	11.2659
ABHD5	10.243	9.92556	9.97401
ABHD6	8.74649	8.57022	8.643
ABHD8	9.58412	9.77142	9.54552
ABI1	12.2752	12.1347	12.1725
ABI2	10.8379	10.9909	10.9875
ABI3	8.89804	8.85904	8.90774
ABI3BP	7.53567	7.88562	7.74572
ABL1	12.1404	12.0579	11.9499
ABL2	10.877	10.7408	10.4928
ABLIM1	13.3832	13.0515	13.0396
ABLIM2	9.44985	8.9029	8.83734
ABLIM3	9.37197	8.7256	8.38232
ABO	9.6023	9.22747	8.90786
ABR	11.9926	12.0726	12.0709
ABRA	1.40958	1.4174	1.31408
ABRACL	10.981	11.079	11.0619
ABT1	11.2198	11.1678	11.1431
ABTB1	10.9743	10.8285	10.6264
ABTB2	8.9434	8.82723	8.70691
AC002310.13	0.0117647	0.0126582	0
AC002365.5	1.44405	1.53763	1.68721
AC002398.9	1.82451	1.83913	1.73066
AC002429.5	0.282353	0.20946	0.169241
AC002985.3	0.636759	0.651672	0.483709
AC003002.4	0.0117647	0	0
AC003002.6	1.92828	2.02542	2.02457
AC003005.4	0.112764	0.231447	0.347346
AC003006.7	0.519017	0.530747	0.645523
AC004076.7	1.59563	1.73822	1.66487
AC004076.9	0.809589	0.863901	0.905334
AC004158.1	1.08076	1.37847	1.2874
AC004381.6	8.80784	8.88918	8.71703
AC004754.3	2.91665	2.95883	2.74211
AC004813.1	0.888983	0.987322	0.864209
AC004824.2	0.0352941	0.0606643	0.0454545
AC004953.1	0.101	0.213049	0.17553
AC004980.11	0.834376	0.750484	0.783409
AC005042.1	0.190234	0.187247	0.214696
AC005281.1	1.59669	1.62839	1.60265
AC005477.1	0.716059	0.913675	0.572519
AC005480.1	1.84935	1.63885	1.34126
AC005779.2	1.10746	1.15851	1.10205
AC006116.20	5.5788	5.69049	5.88973
AC006328.4	0	0.0100314	0
AC006386.1	0.645983	0.565205	0.560631
AC006445.1	0	0	0
AC006449.2	0	0	0
AC006486.9	0.138293	0.180442	0.134953
AC006538.4	0	0.0253165	0.0151515
AC006547.14	3.65557	3.55918	3.4789
AC006994.3	0.575127	0.429657	0.492054
AC007040.11	2.40682	2.6716	2.65672
AC007163.2	1.36771	1.99249	1.53808
AC007326.1	0.332932	0.291852	0.24659
AC007557.5	0.0117647	0.00632911	0.0240146
AC007906.1	0.150058	0.147721	0.229847
AC008074.1	2.88738	2.88248	2.86253
AC008622.1	0.291234	0.219492	0.223559
AC008641.1	0.551865	0.457238	0.609799
AC008686.1	1.55447	1.40748	1.28714
AC008759.1	0.742118	0.695055	0.738735
AC008810.1	0.698657	0.815982	0.653227
AC008914.1	0.220646	0.263796	0.184393
AC009014.3	1.17617	1.52581	1.45248
AC009022.1	0.503368	0.748272	0.575782
AC009060.2	1.60416	1.87569	1.47663
AC009065.4	0	0	0
AC009121.2	0	0	0
AC009133.22	0.042176	0.0480061	0.0606061
AC009336.19	2.33885	2.51886	2.93129
AC009491.1	0	0.00632911	0
AC009491.2	0	0	0
AC009977.1	0.0117647	0.00632911	0.030303
AC010184.1	0.0304113	0.00632911	0.0694691
AC010287.1	1.19793	1.16706	1.13669
AC010547.9	0.736682	0.686318	0.382526
AC010642.1	4.66743	4.68269	4.67597
AC010646.3	0	0.0506329	0.0454545
AC010655.1	0.0352941	0.0189873	0.0454545
AC010731.4	0.0470588	0.288711	0.317935
AC011155.1	0	0	0
AC011242.6	3.82747	3.75185	3.66805
AC011380.1	0.0235294	0.0669934	0
AC011513.3	0.640259	0.480964	0.435433
AC011530.4	0.704806	0.66255	0.473707
AC012005.3	0.0705882	0.0770248	0.0694691
AC012005.4	0	0	0
AC012363.2	0.534525	0.56202	0.565508
AC013269.5	0	0.0126582	0
AC013286.1	0.0352941	0.0189873	0.0543176
AC015688.3	0.708593	0.632932	0.65154
AC016142.1	0.198905	0.31181	0.289043
AC016549.1	0.700616	0.709823	0.632674
AC016577.1	0.195117	0.204683	0.160378
AC016734.1	0.0235294	0.0379747	0.0151515
AC016753.2	0.0235294	0.0379747	0.030303
AC017028.10	0.101	0.098639	0.130075
AC017081.1	0.302999	0.333789	0.324223
AC018512.1	0.36582	0.348225	0.355937
AC018867.1	0.671244	0.667587	0.554342
AC018902.1	0.0588235	0.0379747	0.0606061
AC019206.1	2.06739	2.02955	2.15244
AC022210.1	0.0235294	0.0316456	0
AC022431.2	1.45413	1.32111	1.49169
AC022819.2	0.0843521	0.0822785	0.0757576
AC024060.1	1.84669	1.59764	1.81275
AC024361.1	1.4087	1.30408	1.35224
AC024592.12	0.308785	0.303808	0.236136
AC025263.3	0.0657054	0.0126582	0.0151515
AC025335.1	9.14975	9.00968	8.96346
AC026449.1	0.0235294	0.0453793	0.030303
AC037459.4	1.68503	1.68775	1.31365
AC055733.1	1.22424	1.49539	1.00652
AC055866.1	1.19333	0.981686	0.777014
AC063956.1	0	0	0
AC064829.1	0	0	0
AC068533.7	1.78542	1.65658	1.73801
AC069063.1	0.340292	0.44976	0.337072
AC069063.2	0.513879	0.549475	0.605469
AC069368.3	1.13972	1.08511	1.05083
AC069499.1	0.782913	0.805177	0.748393
AC073072.1	0.0235294	0.0379747	0.030303
AC073130.2	0.692563	0.51994	0.566919
AC073333.1	0.315681	0.495889	0.499539
AC073610.5	0.0117647	0.0126582	0
AC073657.1	2.69663	2.53483	2.40976
AC073869.1	1.27257	1.28895	1.32117
AC074033.1	0	0	0
AC079355.1	0.0117647	0	0
AC079907.1	1.75701	1.72768	1.62195
AC084219.2	0.244175	0.327573	0.290453
AC087350.1	3.08145	3.128	3.19831
AC087392.1	0.199115	0.208758	0.220984
AC087651.1	0.222956	0.0937174	0.0151515
AC087651.2	0.394055	0.32109	0.319346
AC087762.1	0.441984	0.355421	0.306497
AC090154.1	2.97841	2.75752	2.90123
AC091180.1	1.91324	1.82547	1.68632
AC092159.1	0.274108	0.314596	0.239383
AC092384.1	0.559842	0.558441	0.575782
AC092835.2	4.55365	4.07076	3.99158
AC092881.1	2.23431	2.06309	2.05092
AC100821.2	0.131411	0.144018	0.169241
AC104057.1	0.0235294	0.0126582	0.0151515
AC104073.2	0.131411	0.144018	0.184393
AC104389.1	0	0.00632911	0.0151515
AC104389.2	0	0	0
AC104532.2	1.15091	1.07756	1.12074
AC104534.3	0.6411	0.569292	0.573479
AC104581.1	0.779551	0.738969	0.753887
AC104650.2	1.50963	1.33678	1.15054
AC104809.3	2.43714	2.20619	1.71386
AC104981.1	0.568512	0.658836	0.611036
AC105009.1	1.31042	1.30106	1.12922
AC107081.1	0.201999	0.129695	0.214696
AC108925.1	1.43185	1.38472	1.32647
AC108938.5	3.82713	3.45028	3.35864
AC109829.1	3.012	3.07939	2.86715
AC109829.2	0.284352	0.269049	0.262725
AC110602.1	1.11275	1.2089	1.20636
AC110615.1	1.9596	1.89618	1.73158
AC112719.2	0.0235294	0.0253165	0.030303
AC114783.1	0.0117647	0.0379747	0.0151515
AC118758.1	0.332315	0.208271	0.220984
AC124312.1	0.131411	0.111783	0.114924
AC126407.1	0	0	0
AC129492.1	0	0	0
AC131097.4	3.37701	3.47718	3.89198
AC131263.1	4.05841	3.8277	3.91186
AC138028.1	0	0	0
AC138647.1	0.0304113	0.0189873	0.0654838
AC138969.4	4.50449	4.30632	4.16204
AC231657.1	0.32826	0.423585	0.565755
AC234582.1	3.40931	3.02854	3.24284
AC234582.2	0.0608226	0.0226896	0.0606061
AC241377.2	2.72168	2.84913	2.63185
AC241585.2	4.29851	4.01381	3.93485
AC242988.1	1.21927	1.1071	1.25802
AC243945.1	1.47937	1.58148	1.28036
AC244230.1	3.16377	3.07764	2.94738
AC245100.1	6.66193	6.55184	6.58886
ACAA1	10.8225	10.7517	10.8906
ACAA2	9.77421	9.98564	9.74355
ACACA	12.2063	12.2032	12.1332
ACACB	9.19714	9.3882	9.45911
ACAD10	10.3682	10.3525	10.1972
ACAD11	4.79758	4.80425	4.68834
ACAD8	10.1087	9.97456	9.93207
ACAD9	11.9678	11.9756	11.8943
ACADL	4.57534	4.19084	3.84035
ACADM	11.05	11.0811	11.1686
ACADS	10.3057	10.3177	10.2202
ACADSB	9.15171	9.28343	9.41474
ACADVL	13.7942	13.7886	13.6018
ACAN	5.73518	6.3096	5.77914
ACAP1	9.48706	9.38556	9.27318
ACAP2	11.8149	11.9297	11.8836
ACAP3	11.7403	11.6112	11.557
ACAT1	10.259	10.427	10.3082
ACAT2	10.8934	11.1003	11.1935
ACBD3	11.9087	11.87	11.8159
ACBD4	8.77782	8.94225	8.85542
ACBD5	10.691	10.6584	10.5919
ACBD7	4.98257	5.30357	5.47832
ACCS	9.027	8.96322	8.92565
ACCSL	0.161822	0.135062	0.239505
ACD	10.481	10.5655	10.3665
ACE	8.99244	9.19973	8.70693
ACE2	7.28379	7.27743	7.4681
ACER1	1.90223	1.85081	1.62747
ACER2	6.73523	6.3807	6.13967
ACER3	10.5041	10.3805	10.1679
ACHE	6.26086	6.49683	6.78103
ACIN1	13.4201	13.3465	13.2689
ACKR1	7.20758	7.43277	7.0361
ACKR2	6.83889	6.38567	6.2347
ACKR3	10.9168	10.6718	10.931
ACKR4	5.28111	5.10454	5.49715
ACLY	12.7724	12.8253	12.6996
ACMSD	1.88427	2.19514	2.06092
ACN9	9.57657	9.65935	9.49076
ACO1	11.0551	10.9489	10.8111
ACO2	11.8936	11.8564	11.8917
ACOT1	6.6198	6.61781	6.10375
ACOT11	9.02224	9.0966	9.06929
ACOT12	0.512094	0.797785	0.944296
ACOT13	10.1742	10.3631	10.2146
ACOT2	9.03954	9.09774	8.72969
ACOT4	8.08649	8.19565	7.87191
ACOT6	0.655481	0.742506	0.675826
ACOT7	11.4938	11.5714	11.6124
ACOT8	10.2065	10.3486	10.3269
ACOT9	11.2043	11.2284	10.8573
ACOX1	11.7188	11.6486	11.5681
ACOX2	5.03667	5.4052	5.38257
ACOX3	9.85939	10.007	10.1101
ACOXL	4.88041	4.89792	4.51344
ACP1	12.2451	12.1948	12.134
ACP2	11.3179	11.297	11.2019
ACP5	11.1678	11.2131	11.1935
ACP6	9.7836	9.7659	9.77777
ACPP	8.41984	8.87152	8.56567
ACPT	3.04749	3.21045	3.19655
ACR	2.41981	2.17697	2.2584
ACRBP	6.09234	6.22378	6.25547
ACRC	5.81254	5.80317	5.90805
ACRV1	5.1539	5.10482	4.92444
ACSBG1	4.9379	4.52268	4.49872
ACSBG2	3.12519	3.01062	2.99345
ACSF2	10.8963	10.7635	10.5351
ACSF3	10.5987	10.5916	10.4091
ACSL1	11.1961	11.4511	11.5953
ACSL3	12.1863	12.1556	12.0001
ACSL4	11.1825	11.058	10.7252
ACSL5	11.0496	10.4756	10.804
ACSL6	4.37042	4.30327	5.12901
ACSM1	4.15233	4.34433	4.18773
ACSM2A	0.709073	0.794078	0.740935
ACSM2B	0.667054	0.721479	0.67987
ACSM3	6.70681	6.72827	6.87382
ACSM4	1.34004	1.21588	0.988267
ACSM5	3.28326	3.21755	3.76978
ACSM6	0.615304	0.670694	0.534313
ACSS1	10.1622	10.5161	10.5873
ACSS2	11.2125	11.3689	11.4342
ACSS3	5.57709	5.64465	5.4079
ACTA1	4.41071	4.41459	4.19098
ACTA2	11.3734	11.8269	11.5359
ACTB	18.1762	18.1556	18.0229
ACTBL2	3.27565	2.80282	1.88682
ACTC1	3.26996	3.97095	3.51735
ACTG1	17.6557	17.6069	17.4423
ACTG2	7.59493	8.48843	8.29047
ACTL10	7.39486	7.27233	7.36298
ACTL6A	12.4154	12.5397	12.4245
ACTL6B	1.37859	1.33234	1.35834
ACTL7A	0.198905	0.145094	0.199544
ACTL7B	0.777819	0.586963	0.579768
ACTL8	3.39639	3.17679	3.16234
ACTL9	0.312345	0.167783	0.0543176
ACTN1	13.8532	13.7263	13.2588
ACTN2	2.7472	2.67753	2.49669
ACTN3	2.08596	2.07874	2.16196
ACTN4	15.2773	15.2763	15.0196
ACTR10	11.5434	11.5216	11.3837
ACTR1A	12.7702	12.6477	12.5499
ACTR1B	11.9505	11.9504	11.9792
ACTR2	13.8202	13.7655	13.6641
ACTR3	13.7095	13.7218	13.5786
ACTR3B	8.00665	8.18327	8.21638
ACTR3C	6.94496	7.03069	6.81015
ACTR5	9.69749	9.74669	9.69267
ACTR6	10.4608	10.538	10.4467
ACTR8	9.9967	9.87335	9.94163
ACTRT1	0.0539407	0.102341	0.0694691
ACTRT2	0.0117647	0.0253165	0.0606061
ACTRT3	7.38988	7.29192	7.14782
ACVR1	10.755	10.761	10.6125
ACVR1B	11.5462	11.5255	11.5559
ACVR1C	6.78592	6.64383	7.32807
ACVR2A	9.51236	9.47021	9.48632
ACVR2B	9.08987	9.01343	9.04475
ACVRL1	9.00626	9.13164	8.95646
ACY1	7.99853	7.70413	7.74367
ACY3	6.77961	6.63727	6.35429
ACYP1	9.5535	9.53842	9.35793
ACYP2	8.82141	8.89136	8.89082
AD000671.6	1.74921	1.80122	1.80728
ADA	9.8391	9.61918	9.69466
ADAD1	0.143176	0.204539	0.17553
ADAD2	4.70926	4.95024	5.20987
ADAL	8.70178	8.78735	8.57261
ADAM10	12.826	12.5971	12.4117
ADAM11	5.92251	5.79777	5.83179
ADAM12	9.02883	9.06886	8.32071
ADAM15	13.6118	13.5241	13.5587
ADAM17	10.927	10.7591	10.7838
ADAM18	0.274027	0.191685	0.130075
ADAM19	9.87571	10.0668	9.87006
ADAM2	0.338411	0.293569	0.174119
ADAM20	2.3018	2.25646	2.11586
ADAM21	2.7423	2.87945	3.14659
ADAM22	7.15753	7.52669	7.50269
ADAM23	6.39816	7.79492	7.98677
ADAM28	9.11705	9.19647	9.13729
ADAM29	0.400904	0.715065	0.520054
ADAM30	0.0539407	0.0960122	0.0957868
ADAM32	5.43466	5.29917	5.20782
ADAM33	7.44786	7.14897	6.71407
ADAM7	0.183085	0.472525	0.320412
ADAM8	11.6575	11.0183	10.8743
ADAM9	12.5778	12.614	12.3042
ADAMDEC1	7.36344	7.25306	7.66476
ADAMTS1	9.71571	9.75298	9.38656
ADAMTS10	7.24512	7.36566	6.99693
ADAMTS12	7.32138	7.60168	7.02894
ADAMTS13	7.29009	7.01224	6.97368
ADAMTS14	7.59279	7.27458	7.06243
ADAMTS15	7.64321	7.19903	6.78574
ADAMTS16	4.35521	4.55071	4.39176
ADAMTS17	7.91677	7.57235	7.70363
ADAMTS18	2.63239	3.02984	3.3099
ADAMTS19	2.41964	2.08667	1.81737
ADAMTS2	9.92587	9.89034	9.23123
ADAMTS20	0.883795	1.23278	1.36592
ADAMTS3	4.76868	4.59746	4.70298
ADAMTS4	8.78303	8.99357	8.62577
ADAMTS5	5.98269	6.31509	6.20994
ADAMTS6	5.88412	5.78426	5.50986
ADAMTS7	8.33989	8.09411	7.87712
ADAMTS8	4.39222	3.92756	3.84077
ADAMTS9	7.98652	7.92902	7.61186
ADAMTSL1	5.58805	5.95067	5.56504
ADAMTSL2	7.38165	7.70368	7.53662
ADAMTSL3	7.77681	7.2916	6.94067
ADAMTSL4	9.7817	9.11481	8.89631
ADAMTSL5	9.15791	8.16802	8.25907
ADAP1	9.03728	8.89292	8.47908
ADAP2	8.37606	8.45235	8.58856
ADAR	14.3432	14.2566	14.2017
ADARB1	9.28761	9.28568	9.07361
ADARB2	4.75834	4.51127	4.63929
ADAT1	9.98521	9.96497	9.64481
ADAT2	9.20005	8.89593	8.97545
ADAT3	7.60525	7.32211	7.3879
ADCK1	9.0465	8.9866	8.90995
ADCK2	10.6745	10.8811	10.8368
ADCK3	10.85	10.849	10.9988
ADCK4	10.9876	11.0683	10.7634
ADCK5	9.90047	9.81356	9.72061
ADCY1	6.99392	6.62006	6.95489
ADCY10	3.12479	3.21127	2.98703
ADCY2	4.22616	4.6314	3.94109
ADCY3	11.224	11.2233	11.0901
ADCY4	7.92102	7.9844	7.84195
ADCY5	6.47956	6.71257	7.02309
ADCY6	11.1906	11.1423	11.1685
ADCY7	9.07956	8.65559	8.65542
ADCY8	0.64597	0.691147	0.637171
ADCY9	10.7042	10.3628	10.3127
ADCYAP1	3.18337	2.95704	2.33046
ADCYAP1R1	4.23306	3.68589	3.62762
ADD1	12.8009	12.9232	12.8588
ADD2	6.253	6.11161	6.51881
ADD3	11.8514	11.8942	11.9458
ADGB	1.37159	0.990822	0.818614
ADH1A	1.42989	1.53767	1.76643
ADH1B	2.1215	2.63944	3.07022
ADH1C	4.98614	5.0153	4.76083
ADH4	1.55038	1.51372	1.81881
ADH5	12.7819	12.7416	12.7732
ADH6	4.47659	4.52511	4.85035
ADH7	6.31034	6.99668	7.71298
ADHFE1	7.5504	7.34503	7.16965
ADI1	12.5419	12.538	12.417
ADIG	0.213764	0.282807	0.236136
ADIPOQ	0.452093	0.596002	0.751649
ADIPOR1	13.1669	13.1309	13.0804
ADIPOR2	12.4072	12.3837	12.3178
ADIRF	0.114763	0.041677	0.0391661
ADK	11.5058	11.2033	11.1049
ADM	11.7707	11.6975	11.4997
ADM2	8.40322	8.47029	8.46261
ADM5	5.97419	5.90978	5.95216
ADNP	12.742	12.8071	12.8389
ADNP2	10.8321	10.7518	10.6127
ADO	10.5144	10.4588	10.3429
ADORA1	7.03453	7.11732	7.38947
ADORA2A	3.63925	3.8692	3.5211
ADORA2B	9.43036	9.16293	9.23424
ADORA3	6.96288	7.03925	7.37289
ADPGK	11.8279	11.7135	11.479
ADPRH	8.27142	8.43272	8.46415
ADPRHL1	7.1743	6.97183	6.8999
ADPRHL2	11.5575	11.539	11.5187
ADPRM	8.24303	8.15029	8.08908
ADRA1A	0.570966	0.779185	0.931366
ADRA1B	2.85109	2.90533	2.58254
ADRA1D	3.56428	3.29734	2.8736
ADRA2A	7.5291	7.21609	7.08351
ADRA2B	5.02186	5.52658	5.36549
ADRA2C	7.65761	7.4527	7.22468
ADRB1	5.49428	5.50567	5.83419
ADRB2	8.93662	8.22313	8.50046
ADRB3	1.18707	1.22836	1.10945
ADRBK1	13.0005	12.9466	12.9595
ADRBK2	9.26398	9.22529	9.20453
ADRM1	12.8656	13.0164	12.9189
ADSL	11.3952	11.4758	11.2451
ADSS	12.1866	12.1468	12.1054
ADSSL1	9.60011	9.46654	9.10375
ADTRP	6.74353	6.54278	6.52902
AEBP1	12.8211	12.791	12.2639
AEBP2	11.1721	11.2107	11.1273
AEN	10.9229	10.8335	10.493
AES	14.2897	14.4028	14.3538
AF131216.1	2.83134	2.8266	2.69186
AF165138.7	1.32912	1.50421	1.26927
AFAP1	10.8905	11.0084	10.6867
AFAP1L1	8.8403	8.50822	8.34251
AFAP1L2	11.4917	10.9149	10.6719
AFF1	11.7149	11.7085	11.6237
AFF2	4.99799	4.76855	5.182
AFF3	5.97405	5.55593	5.20489
AFF4	11.9748	11.9353	11.8848
AFG3L2	11.7148	11.6625	11.7013
AFM	0.439556	0.371414	0.479719
AFMID	10.576	10.563	10.4589
AFP	1.29745	1.47224	1.09845
AFTPH	11.1922	11.2745	11.2267
AGA	10.0029	10.0025	9.87981
AGAP1	10.454	10.5566	10.6825
AGAP10	7.59813	7.19663	7.14071
AGAP2	8.10519	7.92992	7.981
AGAP3	11.9216	11.9318	11.9536
AGAP4	6.69172	6.55106	6.42024
AGAP5	3.69452	3.52871	3.48362
AGAP6	8.61864	8.50451	8.43716
AGBL1	1.3457	1.46888	1.48657
AGBL2	6.21668	6.00925	5.84075
AGBL3	6.43776	6.66299	6.61093
AGBL4	1.41435	1.80636	1.98903
AGBL5	10.8886	10.9298	10.8205
AGER	8.19138	8.16283	7.988
AGFG1	11.9411	11.9074	11.9986
AGFG2	10.2989	10.3785	10.3458
AGGF1	10.9574	10.8878	10.8313
AGK	10.512	10.6026	10.6707
AGL	11.1903	11.0868	11.263
AGMAT	7.80489	7.69948	7.73399
AGMO	1.33569	1.65419	2.22664
AGO1	10.977	11.0827	11.044
AGO2	11.7021	11.6916	11.6165
AGO3	10.3753	10.3048	10.2873
AGO4	10.2342	10.3536	10.391
AGPAT1	11.3855	11.4344	11.3305
AGPAT2	12.0558	11.8757	11.7615
AGPAT3	11.9112	12.0221	12.2137
AGPAT4	9.12903	8.86271	8.58608
AGPAT5	10.5968	10.5284	10.4555
AGPAT6	11.8277	11.819	11.7315
AGPAT9	7.49397	7.42797	7.12047
AGPS	11.8634	11.6461	11.3784
AGR2	11.7405	11.2	10.0165
AGR3	5.40468	5.07614	3.21629
AGRN	14.4897	14.3462	14.066
AGRP	1.72677	1.83063	1.91407
AGT	5.35428	5.34193	5.09526
AGTPBP1	9.78447	9.63175	9.61451
AGTR1	2.62909	2.78246	2.42089
AGTR2	0.755691	0.621158	0.581602
AGTRAP	12.2515	11.9875	11.9014
AGXT	1.9704	1.90579	2.29334
AGXT2	0.65425	0.605695	0.569673
AHCTF1	11.5015	11.4853	11.3918
AHCY	13.3295	13.3618	13.2869
AHCYL1	12.8019	12.7289	12.8151
AHCYL2	9.91531	9.90185	9.96219
AHDC1	11.3613	11.432	11.375
AHI1	9.62112	9.57533	9.58215
AHNAK	15.6052	15.3952	15.527
AHNAK2	12.5652	12.2145	11.8171
AHR	12.1857	11.8946	11.6689
AHRR	7.15583	7.13585	6.57207
AHSA1	12.6116	12.6252	12.4707
AHSA2	10.9107	10.8522	10.7579
AHSG	1.81715	2.06365	1.866
AHSP	0.641311	0.853956	1.10199
AICDA	1.42811	1.75058	1.48962
AIDA	10.0126	10.024	9.95873
AIF1	9.38768	9.43186	9.50892
AIF1L	10.7002	10.3754	9.78239
AIFM1	11.3633	11.4156	11.4085
AIFM2	10.0758	10.0844	9.73647
AIFM3	6.86346	6.81901	6.92961
AIG1	10.9517	10.7199	10.6561
AIM1	12.6849	12.2307	12.2918
AIM1L	11.1519	10.8008	11.0919
AIM2	9.11896	8.45438	9.26034
AIMP1	11.5795	11.5441	11.5011
AIMP2	10.2137	10.0728	10.0015
AIP	11.7722	11.7865	11.7071
AIPL1	1.71807	2.15949	2.31305
AIRE	1.5853	1.57059	1.5671
AJ239318.1	0	0	0.0240146
AJAP1	5.43893	4.60109	3.67458
AJUBA	12.0324	11.5711	11.5653
AK1	9.51766	9.3511	9.23345
AK2	13.1241	13.0906	13.1267
AK3	11.9863	11.8202	11.7431
AK4	11.0438	10.9713	11.2042
AK5	3.69049	4.09513	3.70639
AK7	6.62725	6.48452	6.06899
AK8	5.99684	6.00647	6.06961
AK9	7.88096	7.89824	7.94314
AKAP1	11.8447	11.8547	11.7526
AKAP10	10.3806	10.3013	10.1788
AKAP11	11.1551	11.0237	11.0112
AKAP12	9.01025	9.07061	8.30533
AKAP13	12.5922	12.4453	12.2163
AKAP14	1.43519	1.34399	1.46998
AKAP17A	11.5952	11.6845	11.6417
AKAP2	2.73275	2.62582	2.21503
AKAP3	5.32002	5.24335	5.24564
AKAP4	0.124529	0.151755	0.261213
AKAP5	7.69483	7.83128	7.64247
AKAP6	6.99785	6.86017	6.79451
AKAP7	7.89809	8.03207	8.34735
AKAP8	11.1848	11.0934	11.011
AKAP8L	11.3756	11.3202	11.3365
AKAP9	11.2898	11.3876	11.3499
AKIP1	10.3936	10.2125	10.1298
AKIRIN1	11.5886	11.567	11.5264
AKIRIN2	11.128	11.1566	11.1087
AKNA	10.8721	10.7306	10.6282
AKNAD1	2.56478	2.56887	2.41734
AKR1A1	13.0782	13.0437	13.0205
AKR1B1	11.3338	11.6485	11.2665
AKR1B10	9.25102	9.54383	9.68745
AKR1B15	6.72638	6.90446	7.03358
AKR1C1	8.92331	9.273	9.20283
AKR1C2	9.13811	9.458	9.73528
AKR1C3	9.71463	10.1445	10.0728
AKR1C4	1.68487	1.81884	1.78453
AKR1D1	0.90797	1.2433	1.22875
AKR1E2	7.50549	7.77414	7.49562
AKR7A2	11.2403	11.3319	11.2473
AKR7A3	6.99809	6.77356	6.82218
AKT1	12.882	12.9042	12.6897
AKT1S1	11.8278	11.7279	11.5812
AKT2	12.6981	12.7762	12.6839
AKT3	9.11165	9.33253	9.17436
AKTIP	10.0675	10.0789	10.1058
AL008723.1	0.206882	0.225821	0.306769
AL021546.6	0.857074	0.787378	0.722444
AL022578.1	0.331411	0.392902	0.399089
AL023806.1	2.74023	2.75023	2.48836
AL049794.1	0.829896	0.789734	1.01791
AL049872.1	0.363821	0.399707	0.199544
AL109927.1	0	0	0
AL133335.1	0.360727	0.590149	0.38624
AL133475.1	0.0117647	0	0
AL135745.1	1.77291	1.96282	1.90102
AL135842.1	0	0.00632911	0
AL137164.1	0.0117647	0	0.030303
AL138706.2	1.17031	1.24658	1.3677
AL138751.1	0.0705882	0.0606643	0.0694691
AL139333.1	0.213764	0.155601	0.251287
AL158839.1	0.619569	0.622425	0.725542
AL162426.1	0.208881	0.133987	0.0454545
AL354828.1	0.197116	0.212419	0.23871
AL354828.2	0.201999	0.225821	0.169241
AL356135.1	0.0117647	0	0.0151515
AL356289.1	0.442812	0.468851	0.353634
AL356585.2	1.07049	1.05641	0.91746
AL357140.1	1.37384	1.44482	1.39358
AL358852.1	4.31153	4.34228	4.08656
AL365181.2	3.63343	3.78114	3.78877
AL365202.1	0.278374	0.404112	0.253862
AL445183.1	0.15494	0.267498	0.241013
AL513523.2	0	0	0
AL589743.1	3.26722	2.94545	2.73086
AL591806.1	1.22651	1.15275	0.941577
AL596220.1	0.212879	0.10867	0.15409
AL645728.1	0.161822	0.198353	0.251287
AL645922.1	0	0	0
ALAD	11.2679	11.0954	11.1524
ALAS1	11.4455	11.4054	11.442
ALAS2	2.46639	2.54312	2.5703
ALB	2.96058	2.98932	3.21712
ALCAM	12.246	12.1718	11.4336
ALDH16A1	12.0359	11.9227	11.71
ALDH18A1	12.1127	11.9965	11.9972
ALDH1A1	9.77134	10.7355	10.2393
ALDH1A2	8.09687	7.27869	6.83393
ALDH1A3	10.5114	9.55467	9.89326
ALDH1B1	10.472	10.4337	10.1236
ALDH1L1	7.41147	7.52642	8.21378
ALDH1L2	7.40149	7.76843	7.20063
ALDH2	12.269	12.2402	12.5517
ALDH3A1	10.6677	10.466	9.78485
ALDH3A2	12.5662	12.6129	12.4462
ALDH3B1	10.3736	9.80336	9.47909
ALDH3B2	10.3724	10.4444	10.8425
ALDH4A1	10.6043	10.5978	10.59
ALDH5A1	10.0884	10.1149	10.437
ALDH6A1	10.2075	10.1798	10.1274
ALDH7A1	11.7314	11.3087	10.7202
ALDH8A1	4.05215	4.13768	4.01076
ALDH9A1	12.1303	12.1987	12.326
ALDOA	16.216	16.3388	16.2951
ALDOB	2.68651	2.78612	3.35814
ALDOC	10.0078	10.1444	10.3608
ALG1	10.1862	9.9294	9.80456
ALG10	8.21003	8.10149	7.96292
ALG10B	9.55105	9.46599	9.30118
ALG11	8.3434	8.11216	7.98848
ALG12	9.57009	9.43929	9.35071
ALG13	10.4801	10.4979	10.4619
ALG14	9.04446	8.92334	9.00708
ALG1L	9.09887	9.30353	9.32688
ALG1L2	5.11814	5.00671	5.24829
ALG2	10.9342	10.7161	10.5498
ALG3	12.0525	11.9669	11.8865
ALG5	10.7638	10.5469	10.4693
ALG6	10.5153	10.4891	10.463
ALG8	10.8354	10.5883	10.4266
ALG9	8.27733	8.29084	8.20132
ALK	2.67202	3.16792	3.50428
ALKBH1	9.41495	9.32964	9.08857
ALKBH2	10.2405	10.1008	9.93351
ALKBH3	9.77108	9.37448	9.41907
ALKBH4	9.49958	9.5607	9.53224
ALKBH5	12.3632	12.3799	12.2513
ALKBH6	7.85802	7.91386	7.76544
ALKBH7	10.5376	10.6286	10.6433
ALKBH8	8.58802	8.37543	8.36427
ALLC	0.687944	0.932844	0.582083
ALMS1	10.4397	10.4418	10.4157
ALOX12	7.3106	7.00027	7.26954
ALOX12B	6.39068	5.81035	6.05997
ALOX15	5.98875	5.84653	5.5918
ALOX15B	7.90869	7.23635	7.64515
ALOX5	9.78421	9.41694	9.54734
ALOX5AP	9.28756	9.18788	9.25871
ALOXE3	6.4626	5.8946	5.752
ALPI	0.978997	1.11984	1.16851
ALPK1	10.1481	10.1134	10.2205
ALPK2	5.26968	5.52783	4.87043
ALPK3	9.31924	9.134	8.56097
ALPL	8.66407	8.77691	8.29956
ALPP	5.42238	3.93736	3.06002
ALPPL2	3.95524	2.87712	2.17865
ALS2	10.1682	10.1969	10.0802
ALS2CL	12.4853	11.7481	11.925
ALS2CR11	2.7361	3.31894	3.57459
ALS2CR12	3.70257	3.51321	3.36104
ALX1	2.74831	2.33935	2.238
ALX3	1.50316	2.38071	2.74161
ALX4	2.88257	2.50029	2.27029
ALYREF	12.3964	12.4996	12.2641
AMACR	7.63433	7.66588	7.50776
AMBN	0.321167	0.594569	0.544894
AMBP	3.04361	3.1185	3.05351
AMBRA1	10.8929	10.7172	10.7197
AMD1	12.3804	12.322	12.1754
AMDHD1	5.06342	5.13573	4.98045
AMDHD2	9.79084	9.67326	9.66764
AMELX	0.131411	0.323678	0.444888
AMELY	0	0.00632911	0
AMER1	8.95721	9.02295	9.24142
AMER2	1.34165	1.01975	0.828485
AMER3	0.749809	0.685596	0.777247
AMFR	12.1904	12.1983	12.0755
AMH	6.94265	7.26842	6.94469
AMHR2	1.70214	1.5072	1.19854
AMICA1	8.88647	8.6704	8.69542
AMIGO1	7.98983	8.2542	8.33464
AMIGO2	9.62588	9.47873	8.82949
AMIGO3	1.46831	1.46951	1.3289
AMMECR1	10.9039	10.7892	10.6603
AMMECR1L	10.8183	10.7648	10.6111
AMN	9.03506	8.71096	8.56774
AMN1	7.38096	7.50406	7.32757
AMOT	8.0153	8.9762	9.43599
AMOTL1	11.7547	11.2912	11.1501
AMOTL2	12.2559	11.901	11.5092
AMPD1	2.64823	2.87441	2.86621
AMPD2	10.8127	10.7547	10.8668
AMPD3	10.3354	9.87128	9.8236
AMPH	5.29825	5.29676	4.86958
AMT	8.78798	8.58037	8.74071
AMTN	5.86243	4.98353	5.4431
AMY1A	0.238322	0.157639	0.147801
AMY1B	0.787001	0.355583	0.53336
AMY1C	0.0235294	0.00632911	0.030303
AMY2A	0.693358	0.48481	0.51549
AMY2B	7.64061	7.49192	7.65214
AMZ1	4.63639	4.49757	4.23431
AMZ2	11.5991	11.6798	11.4882
ANAPC1	9.82494	9.78724	9.6865
ANAPC10	9.00499	9.02285	8.98472
ANAPC11	12.1588	12.3007	12.0901
ANAPC13	11.4875	11.5001	11.2511
ANAPC15	9.65091	9.49621	9.33769
ANAPC16	12.476	12.4346	12.4149
ANAPC2	11.4159	11.3245	11.0951
ANAPC4	10.7269	10.6075	10.5772
ANAPC5	12.9228	12.843	12.7115
ANAPC7	11.8927	11.8801	11.7849
ANG	8.08936	8.11481	8.18466
ANGEL1	10.0498	10.0303	9.79314
ANGEL2	10.4069	10.4133	10.448
ANGPT1	5.20464	5.73339	5.86807
ANGPT2	8.25189	8.38117	8.16883
ANGPT4	3.07724	3.103	3.00304
ANGPTL1	3.64127	4.19583	3.99925
ANGPTL2	9.92596	10.0643	9.54582
ANGPTL3	2.30499	2.26212	2.2062
ANGPTL4	10.2241	10.2561	9.9937
ANGPTL5	1.37783	0.883093	0.768001
ANGPTL6	4.77953	4.73776	4.59213
ANGPTL7	1.37961	1.59581	1.84376
ANHX	0.101	0.15405	0.0606061
ANK1	7.83286	7.30783	7.33404
ANK2	6.39864	6.52069	6.48194
ANK3	10.6176	10.6352	10.7654
ANKAR	6.57019	6.41735	6.33644
ANKDD1A	8.09889	8.04997	8.04438
ANKDD1B	4.5448	4.11462	4.59721
ANKEF1	9.58463	9.5759	9.57006
ANKFN1	3.41404	2.9479	2.84536
ANKFY1	11.6705	11.4977	11.4373
ANKH	11.1055	11.0306	11.0969
ANKHD1	8.17702	8.17753	8.09595
ANKHD1-EIF4EBP3	7.63661	7.60464	7.5761
ANKIB1	11.3638	11.4077	11.3479
ANKK1	5.74653	5.65645	5.39457
ANKLE1	6.74736	6.65335	6.31215
ANKLE2	13.0132	12.8484	12.6647
ANKMY1	9.0523	9.07283	9.16142
ANKMY2	9.7838	9.80738	9.71508
ANKRA2	9.4992	9.53574	9.52356
ANKRD1	3.91573	3.26938	2.39187
ANKRD10	12.0932	11.9305	11.6639
ANKRD11	12.2878	12.3153	12.1904
ANKRD12	10.9607	10.8804	10.8282
ANKRD13A	11.7389	11.5459	11.4349
ANKRD13B	9.06132	8.92891	8.91278
ANKRD13C	10.3519	10.3365	10.2866
ANKRD13D	11.5202	11.3796	11.4057
ANKRD16	8.32286	8.34991	8.30109
ANKRD17	12.1492	12.0865	12.0639
ANKRD18A	6.93403	6.76844	6.49508
ANKRD18B	6.57242	6.29782	6.40801
ANKRD2	4.7693	4.28426	3.77491
ANKRD20A1	1.51069	1.46327	1.50402
ANKRD20A2	0.636082	0.691759	0.731437
ANKRD20A3	0.131411	0.165043	0.147801
ANKRD20A4	1.92928	1.75073	1.75595
ANKRD22	9.51391	9.69944	9.64906
ANKRD23	5.50316	5.72459	5.69904
ANKRD24	6.01682	5.84428	5.78471
ANKRD26	8.98082	8.87405	8.79606
ANKRD27	11.2841	11.2794	11.1644
ANKRD28	11.2636	11.1515	11.1365
ANKRD29	8.11773	8.0851	8.32489
ANKRD30A	0.41989	0.421253	0.214696
ANKRD30B	0.394326	0.406491	0.511432
ANKRD30BL	0.401101	0.364382	0.347747
ANKRD31	3.34698	3.45243	3.27249
ANKRD32	9.6354	9.74278	9.51725
ANKRD33	0.961763	0.712212	1.02785
ANKRD33B	8.2228	7.58609	7.76493
ANKRD34A	5.47804	5.6215	5.67627
ANKRD34B	5.68883	5.97198	5.38529
ANKRD34C	0.657556	0.53506	0.401392
ANKRD35	8.47038	8.35776	8.68054
ANKRD36	7.04333	6.90744	6.72071
ANKRD36B	6.31426	6.12795	6.04113
ANKRD36C	7.22973	6.89027	6.52198
ANKRD37	8.73045	8.74292	8.93807
ANKRD39	8.84636	9.03247	8.9836
ANKRD40	10.8973	10.9579	10.8049
ANKRD42	8.93331	8.57577	8.46579
ANKRD44	8.66051	8.84037	8.92004
ANKRD45	3.40924	3.5547	3.08699
ANKRD46	9.38543	9.37032	9.47792
ANKRD49	9.78759	9.54368	9.37617
ANKRD50	10.6533	10.6715	10.5601
ANKRD52	11.6023	11.6219	11.503
ANKRD53	4.3744	4.33882	4.27014
ANKRD54	10.4725	10.4731	10.365
ANKRD55	2.74573	2.65438	2.69913
ANKRD6	7.97076	8.38559	8.49862
ANKRD60	0.0470588	0.0733225	0.0151515
ANKRD61	4.11771	3.93984	3.91867
ANKRD62	1.26597	1.38645	1.23327
ANKRD63	0.356672	0.710046	0.415404
ANKRD65	10.3184	10.0861	10.302
ANKRD66	1.22871	0.80303	0.509509
ANKRD7	1.23088	1.32716	1.7435
ANKRD9	11.3282	11.0304	10.9284
ANKS1A	11.3855	11.2053	11.155
ANKS1B	3.79557	4.08543	4.13669
ANKS3	9.9682	9.93545	9.83438
ANKS4B	2.31128	2.03801	1.88068
ANKS6	10.7172	10.4303	10.1951
ANKUB1	3.42996	2.7723	2.08003
ANKZF1	11.1014	11.111	11.1649
ANLN	12.3726	12.0967	11.98
ANO1	11.1013	10.5105	10.6698
ANO10	10.4766	10.3465	10.5222
ANO2	4.90322	4.94829	5.07966
ANO3	2.78995	2.5472	2.532
ANO4	4.54181	4.05335	3.69461
ANO5	4.47748	4.10593	3.85527
ANO6	11.7108	11.6716	11.3953
ANO7	6.29411	6.38912	6.17292
ANO8	10.0089	9.80531	9.6821
ANO9	10.9401	10.6424	10.7966
ANP32A	13.0122	13.0221	12.7664
ANP32B	13.8884	13.8349	13.6357
ANP32D	1.07182	0.926948	0.854823
ANP32E	12.5697	12.6669	12.5076
ANPEP	10.2766	9.84483	9.23684
ANTXR1	11.8676	11.8171	11.5575
ANTXR2	9.97894	9.76655	9.32164
ANTXRL	1.06811	1.37459	1.42371
ANXA1	15.4939	15.0897	14.8356
ANXA10	2.88394	2.79502	2.53429
ANXA11	14.0209	13.6764	13.5597
ANXA13	2.30826	2.31718	2.16555
ANXA2	16.3786	16.1634	15.8449
ANXA2R	8.25908	8.1793	7.96249
ANXA3	11.6866	11.4449	10.9646
ANXA4	12.9492	12.8207	12.7857
ANXA5	13.7542	13.7486	13.4761
ANXA6	11.4105	11.5322	11.3515
ANXA7	12.8747	12.7378	12.6179
ANXA8	11.0039	10.1225	10.2596
ANXA8L1	10.0561	9.268	9.39464
ANXA9	8.6625	8.43713	8.46695
AOAH	7.82737	7.70997	8.08387
AOC1	7.53665	7.29313	6.94379
AOC2	5.6063	5.34707	5.17207
AOC3	7.59875	7.66638	7.42435
AOX1	6.42738	5.99477	5.77972
AP000275.65	2.66529	2.63235	2.57085
AP000295.9	1.41636	1.23144	1.25524
AP000304.12	0.408308	0.538801	0.494531
AP000322.53	0	0.0189873	0
AP000349.2	0	0	0
AP000350.10	0.446867	0.574607	0.304194
AP000721.4	0.852405	0.832373	0.545479
AP000866.1	3.74998	3.6751	3.39578
AP001888.1	0	0	0
AP002884.2	1.29617	1.06702	1.29367
AP003419.11	0.533508	0.363253	0.292203
AP005242.1	0.0117647	0	0
AP006285.2	4.29615	4.31376	4.11059
AP1AR	10.2108	10.2075	10.2671
AP1B1	12.942	12.9618	12.8656
AP1G1	12.351	12.3292	12.174
AP1G2	11.5066	11.3477	11.3239
AP1M1	11.3157	11.2635	11.2858
AP1M2	12.1963	11.9042	11.75
AP1S1	11.4885	11.5688	11.4428
AP1S2	9.83781	9.93788	9.95137
AP1S3	8.49349	8.43326	8.24322
AP2A1	12.7792	12.647	12.5351
AP2A2	11.8205	11.7267	11.668
AP2B1	12.9337	12.7158	12.3229
AP2M1	14.9139	14.926	14.7866
AP2S1	12.7512	12.7813	12.5061
AP3B1	11.7796	11.628	11.6109
AP3B2	6.18018	6.55554	7.211
AP3D1	13.1342	13.0881	13.0014
AP3M1	11.3493	11.2057	11.141
AP3M2	10.3032	10.3607	10.3425
AP3S1	11.7217	11.559	11.6751
AP3S2	10.1728	10.0513	9.96436
AP4B1	10.0688	10.0071	10.0526
AP4E1	9.9191	9.71272	9.44293
AP4M1	10.2436	10.4301	10.4272
AP4S1	8.82387	8.83378	8.44594
AP5B1	10.3559	10.2625	10.1567
AP5M1	10.9987	10.9523	10.874
AP5S1	9.46715	9.53738	9.56114
AP5Z1	11.1875	11.0709	11.0829
APAF1	9.86333	9.71059	9.60543
APBA1	7.20669	7.50232	7.8852
APBA2	7.32934	7.31667	7.05848
APBA3	9.87745	9.80897	9.86337
APBB1	8.24364	8.54233	8.69663
APBB1IP	8.24346	8.21746	8.46661
APBB2	10.3009	10.2113	9.85877
APBB3	9.64838	9.53371	9.57114
APC	10.5089	10.435	10.4515
APC2	7.42979	7.06464	7.16756
APCDD1	11.0269	10.7313	10.9551
APCDD1L	4.97693	4.79101	4.31924
APCS	0.383326	0.269209	0.527713
APEH	12.3585	12.2385	12.1954
APELA	2.06923	2.05169	1.93625
APEX1	13.0008	12.9417	12.842
APEX2	11.6696	11.6384	11.6047
APH1A	13.6297	13.6294	13.6801
APH1B	8.20558	8.35566	8.27123
API5	12.4739	12.3302	12.2695
APIP	9.78246	9.69265	9.6705
APITD1	8.39176	8.4139	8.3339
APITD1-CORT	5.66069	5.65751	5.44988
APLF	7.41956	7.40534	7.70684
APLN	7.89506	7.58029	7.24586
APLNR	7.83157	8.20872	7.85213
APLP1	7.69203	8.4853	8.6269
APLP2	14.3128	14.3472	14.0176
APMAP	12.5715	12.748	12.6028
APOA1	3.33608	3.24634	3.21061
APOA1BP	12.3206	12.456	12.3431
APOA2	1.42871	1.21095	1.579
APOA4	0.151846	0.115141	0.350907
APOA5	0.410876	0.406419	0.494271
APOB	2.40697	2.01135	1.92513
APOBEC1	0.78397	0.917841	0.779198
APOBEC2	1.84222	2.0776	2.01374
APOBEC3A	8.55428	7.94497	8.53163
APOBEC3B	10.0696	9.94567	10.1132
APOBEC3C	11.6213	11.7876	11.8226
APOBEC3D	8.19815	8.32576	8.23696
APOBEC3F	8.51776	8.61438	8.55514
APOBEC3G	9.66441	9.9249	10.0543
APOBEC3H	5.6051	5.75674	5.69191
APOBEC4	1.29854	0.833588	0.599711
APOBR	9.28889	9.11868	9.12192
APOC1	10.3139	10.4859	10.8211
APOC2	2.65008	2.68557	2.86562
APOC3	0.575434	0.568972	0.824606
APOC4	0.0705882	0.0506329	0.190681
APOC4-APOC2	1.70411	1.66971	2.0297
APOD	7.94901	7.54044	7.32185
APOE	12.4402	12.561	12.9501
APOF	1.09144	1.34351	1.09316
APOH	1.04638	0.860455	1.23752
APOL1	14.4477	13.9434	14.1877
APOL2	12.0641	11.8298	11.969
APOL3	10.822	10.5803	10.9443
APOL4	9.83502	9.93563	10.0833
APOL5	0.780914	0.578453	0.666691
APOL6	12.3326	12.0164	12.0921
APOLD1	8.97865	9.18583	8.91224
APOM	7.27716	7.19198	7.01881
APOO	9.90353	10.0906	10.0171
APOOL	9.78188	9.87605	9.81385
APOPT1	10.1571	10.1911	10.0331
APP	14.992	14.9533	14.8089
APPBP2	10.8946	10.8777	10.7882
APPL1	11.2265	11.284	11.4253
APPL2	11.258	11.2323	10.9503
APRT	12.424	12.4175	12.1332
APTX	11.0602	10.9411	10.7905
AQP1	10.5752	10.7474	10.6637
AQP10	1.93719	1.87899	1.68806
AQP11	5.89416	5.69391	5.7233
AQP12A	0.348844	0.29257	0.693773
AQP12B	0.595482	0.476944	0.995589
AQP2	2.537	2.25521	1.53269
AQP3	14.5442	14.2238	14.2459
AQP4	1.669	2.19074	2.10078
AQP5	8.4896	8.09088	6.10842
AQP6	4.58145	4.30555	3.22343
AQP7	4.48809	4.22125	3.86338
AQP8	1.59673	1.60246	1.52485
AQP9	6.49997	6.32227	6.25637
AQPEP	3.12352	2.88946	2.92992
AQR	11.6329	11.4978	11.3238
AR	7.59969	7.34833	7.11537
ARAF	12.0126	11.9595	11.9279
ARAP1	12.6594	12.4091	12.3815
ARAP2	10.8868	10.8456	10.8813
ARAP3	10.5178	10.3897	10.3656
ARC	5.07865	5.11188	4.78663
ARCN1	12.8285	12.6759	12.4961
AREG	9.04494	8.99293	8.10983
AREL1	11.3775	11.2685	11.0712
ARF1	14.7759	14.7525	14.6397
ARF3	13.4064	13.3999	13.2637
ARF4	13.251	13.144	13.007
ARF5	12.9203	13.0341	13.033
ARF6	13.6641	13.6153	13.5753
ARFGAP1	12.3626	12.3485	12.2225
ARFGAP2	12.4394	12.357	12.3089
ARFGAP3	12.0027	11.87	11.6104
ARFGEF1	11.8366	11.8571	11.8151
ARFGEF2	11.4717	11.4898	11.5454
ARFIP1	10.9404	10.889	10.8412
ARFIP2	11.6678	11.4393	11.2599
ARFRP1	11.4665	11.4115	11.3866
ARG1	3.11778	3.13099	3.11965
ARG2	9.08337	8.75549	8.84638
ARGFX	0.161822	0.171372	0.123787
ARGLU1	12.335	12.1858	12.1043
ARHGAP1	12.8128	12.6507	12.5602
ARHGAP10	9.783	9.62772	9.41583
ARHGAP11A	11.2189	11.1036	10.9098
ARHGAP11B	9.6724	9.54859	9.37786
ARHGAP12	10.4817	10.4602	10.2884
ARHGAP15	7.47557	7.47527	7.53534
ARHGAP17	11.2402	11.1427	11.1281
ARHGAP18	10.0286	9.85116	9.82591
ARHGAP19	9.77338	9.78313	9.71946
ARHGAP19-SLIT1	0.511345	0.697328	0.597561
ARHGAP20	5.2051	5.14315	4.79122
ARHGAP21	11.9102	11.8121	11.6976
ARHGAP22	8.28089	7.87808	7.84808
ARHGAP23	12.7154	12.3369	12.5553
ARHGAP24	7.82811	8.43957	8.23148
ARHGAP25	8.95029	9.0045	9.10754
ARHGAP26	10.4409	10.5953	10.4428
ARHGAP27	11.5515	11.465	11.4522
ARHGAP28	5.9398	6.25344	6.36675
ARHGAP29	9.56879	9.53935	8.89002
ARHGAP30	10.4071	10.2834	10.2459
ARHGAP31	8.88679	9.05885	9.04437
ARHGAP32	11.3767	11.1289	11.0813
ARHGAP33	9.62043	9.9203	9.88064
ARHGAP35	12.3705	12.4254	12.2934
ARHGAP36	0.886477	1.04544	1.01043
ARHGAP39	9.52899	9.55071	9.53681
ARHGAP4	12.0064	12.0734	11.7157
ARHGAP40	8.30488	7.03517	6.97409
ARHGAP42	8.20838	7.66329	7.11364
ARHGAP44	7.35319	7.45515	7.08422
ARHGAP5	12.2474	12.1302	12.0681
ARHGAP6	5.50769	5.78803	5.88911
ARHGAP8	6.7692	6.24727	6.03381
ARHGAP9	9.22639	8.97113	8.94268
ARHGDIA	13.5254	13.4327	13.2733
ARHGDIB	12.3615	12.2145	12.1919
ARHGDIG	2.21742	2.56717	2.30414
ARHGEF1	12.8144	12.7279	12.5388
ARHGEF10	10.1506	9.99063	9.87043
ARHGEF10L	11.2051	11.1594	11.4332
ARHGEF11	11.6408	11.6303	11.6486
ARHGEF12	12.7128	12.5609	12.4476
ARHGEF15	7.38551	7.567	7.36363
ARHGEF16	11.6807	11.5189	11.4316
ARHGEF17	10.8322	10.528	10.1718
ARHGEF18	8.75159	8.5521	8.50657
ARHGEF19	11.3461	11.4888	11.4867
ARHGEF2	11.8225	11.8045	11.6682
ARHGEF25	8.02403	8.3475	8.18191
ARHGEF26	8.56321	8.90941	8.92257
ARHGEF28	10.3736	10.4114	10.3626
ARHGEF3	10.9542	10.8067	10.9126
ARHGEF33	6.91533	7.0836	6.7177
ARHGEF35	7.96072	8.08882	7.95903
ARHGEF37	10.1754	9.7632	9.9627
ARHGEF38	5.6059	5.65465	4.97507
ARHGEF39	9.63759	9.50233	9.30795
ARHGEF4	11.1786	10.8855	11.07
ARHGEF40	10.4213	10.5382	10.6751
ARHGEF5	10.4558	10.5047	10.4574
ARHGEF6	8.69356	8.7878	8.84072
ARHGEF7	11.4752	11.3428	11.2855
ARHGEF9	9.34265	9.40032	9.70571
ARID1A	12.5487	12.5952	12.5371
ARID1B	11.9453	11.9027	11.9581
ARID2	10.8477	10.8911	10.6964
ARID3A	8.78875	8.97888	9.11826
ARID3B	8.75909	8.635	8.43205
ARID3C	3.09953	2.91705	3.08793
ARID4A	9.99617	9.92237	9.78595
ARID4B	11.2224	11.208	11.1011
ARID5A	10.2565	10.2786	10.2036
ARID5B	11.6335	11.4605	11.372
ARIH1	11.9155	11.8608	11.7336
ARIH2	11.6695	11.6088	11.6275
ARIH2OS	5.63733	5.78148	5.91403
ARL1	11.7781	11.8776	11.7713
ARL10	8.91918	8.79305	8.8433
ARL11	6.58151	6.66161	6.9944
ARL13A	3.17645	3.31587	3.3309
ARL13B	9.44949	9.49869	9.44725
ARL14	5.82998	5.18677	4.95088
ARL14EP	10.0062	9.8914	9.82719
ARL14EPL	1.65261	1.25033	0.973492
ARL15	9.78203	9.70165	9.8282
ARL16	10.5955	10.6119	10.4888
ARL17A	5.10414	5.24341	5.19987
ARL17B	4.8178	4.90218	4.71522
ARL2	11.0291	11.0292	10.9906
ARL2-SNX15	0.933874	0.674951	0.569222
ARL2BP	7.68695	7.7045	7.71248
ARL3	10.4426	10.503	10.4056
ARL4A	10.0632	10.2102	10.0952
ARL4C	11.1068	11.362	11.3488
ARL4D	11.0597	10.8413	10.744
ARL5A	10.9274	10.9563	10.9522
ARL5B	11.1443	11.0854	10.9251
ARL5C	0.353845	0.369106	0.360815
ARL6	7.55264	7.49969	7.61267
ARL6IP1	13.8593	13.8422	13.6596
ARL6IP4	7.24609	7.29317	7.06295
ARL6IP5	12.3166	12.2158	12.2163
ARL6IP6	10.6725	10.7141	10.5151
ARL8A	11.2968	11.4099	11.4181
ARL8B	12.5053	12.4288	12.5934
ARL9	5.07739	5.32272	5.1684
ARMC1	10.9992	11.0396	11.0928
ARMC10	10.6283	10.6897	10.7051
ARMC12	3.05536	3.51535	3.31242
ARMC2	6.795	6.93886	6.88778
ARMC3	3.75792	3.20231	2.53124
ARMC4	3.59818	3.54762	3.40197
ARMC5	10.0329	9.99024	9.88117
ARMC6	11.0558	10.9742	10.9084
ARMC7	10.0286	10.0172	9.79505
ARMC8	11.239	11.2776	11.2407
ARMC9	8.42059	8.63058	8.61106
ARMCX1	7.90321	7.54671	7.79128
ARMCX2	9.00224	9.00072	8.96542
ARMCX3	10.7497	10.8885	10.8446
ARMCX4	8.474	8.55386	8.55367
ARMCX5	9.16158	9.10357	9.22423
ARMCX6	9.03424	9.20605	9.2903
ARMS2	0.979953	0.963189	0.725887
ARNT	11.5556	11.5014	11.4759
ARNT2	8.59251	8.73752	8.18794
ARNTL	9.46108	9.37412	9.32623
ARNTL2	11.938	11.6437	11.4574
ARPC1A	13.0869	13.2388	13.1985
ARPC1B	13.3563	13.351	13.1012
ARPC2	14.0894	14.0934	14.2495
ARPC3	13.8122	13.7868	13.5951
ARPC4	12.7814	12.7738	12.72
ARPC4-TTLL3	3.73949	3.5477	3.7651
ARPC5	13.8123	13.7971	13.6772
ARPC5L	12.3204	12.1795	11.9876
ARPIN	11.4069	11.1911	11.0438
ARPP19	13.0587	12.9906	12.7741
ARPP21	0.519665	0.650932	0.409997
ARR3	3.67468	3.58648	3.66251
ARRB1	9.03713	9.0394	9.01695
ARRB2	11.2801	11.3005	11.1127
ARRDC1	12.1035	11.9025	11.6496
ARRDC2	11.2144	10.9818	10.984
ARRDC3	12.2983	12.3779	12.2569
ARRDC4	10.3618	10.1323	9.79141
ARRDC5	3.60943	3.67741	3.58626
ARSA	11.2087	11.2404	10.984
ARSB	9.04369	9.29597	9.12555
ARSD	11.4436	11.6185	11.3901
ARSE	4.65869	5.03268	5.01228
ARSF	3.08831	3.40742	4.2536
ARSG	8.03235	8.22569	8.15699
ARSH	3.15892	3.65809	3.78528
ARSI	8.4859	8.22718	7.83603
ARSJ	8.57534	8.7274	8.68376
ARSK	8.67691	8.66105	8.53516
ART1	0.472607	0.537186	0.417707
ART3	3.44498	3.72126	4.25559
ART4	2.09516	2.19584	1.80605
ART5	3.24562	3.36016	3.38399
ARTN	7.88247	8.2533	7.753
ARV1	10.0513	9.99374	10.0675
ARVCF	10.0305	10.0014	9.89248
ARX	1.83671	2.28326	2.00256
AS3MT	2.43144	2.78237	3.14223
ASAH1	12.5165	12.5756	12.4441
ASAH2	4.8668	4.55031	4.53795
ASAH2B	7.50265	7.31149	7.15172
ASAP1	11.2443	11.1643	11.0528
ASAP2	10.0071	9.82468	9.70676
ASAP3	10.0752	10.3032	10.1991
ASB1	10.0955	10.095	10.0549
ASB10	0.492161	0.400575	0.325906
ASB11	0.509881	0.651816	0.431622
ASB12	2.51349	2.67166	3.58616
ASB13	10.3303	10.182	10.1756
ASB14	5.31963	5.34459	5.49084
ASB15	0.473224	0.555174	0.505478
ASB16	5.92277	5.8823	5.82097
ASB17	0.0588235	0.0984952	0.114924
ASB18	0.898337	0.792529	0.799176
ASB2	8.81102	8.74269	8.74573
ASB4	2.40877	2.62265	2.25796
ASB5	0.526984	0.750315	0.828083
ASB6	11.0188	10.9863	10.8615
ASB7	10.1485	9.94391	9.76759
ASB8	10.5708	10.5367	10.4636
ASB9	6.04754	6.34249	6.34837
ASCC1	10.2861	10.1642	10.0557
ASCC2	12.2629	12.2548	12.1238
ASCC3	11.593	11.4541	11.3986
ASCL1	1.8173	1.67062	1.53036
ASCL2	8.49633	8.57615	8.56882
ASCL3	0.405787	0.407186	0.455365
ASCL4	0.73111	1.05585	1.17703
ASCL5	2.88288	3.19244	3.11762
ASF1A	10.0456	10.0996	10.0698
ASF1B	12.0949	11.9474	11.8779
ASGR1	5.55054	5.81781	5.86403
ASGR2	4.35804	4.42972	4.25135
ASH1L	11.775	11.7361	11.7169
ASH2L	11.4449	11.4368	11.5106
ASIC1	8.51347	8.24731	8.07621
ASIC2	3.38515	2.12435	1.65699
ASIC3	6.27954	6.25904	6.0949
ASIC4	2.74351	2.64852	2.42329
ASIC5	0.38413	0.464885	0.455505
ASIP	2.65138	2.62575	2.65836
ASL	10.3838	10.4307	10.3375
ASMT	2.3125	2.43073	2.35206
ASMTL	10.429	10.5473	10.5281
ASNA1	12.0812	11.9391	11.8937
ASNS	10.4871	10.7217	10.8793
ASNSD1	11.0167	10.9523	10.8789
ASPA	3.69957	3.72153	3.73735
ASPDH	3.00088	2.81053	3.01539
ASPG	7.49699	7.46851	7.52062
ASPH	12.6351	12.7042	12.5168
ASPHD1	7.75393	7.63338	7.35503
ASPHD2	8.64562	8.49184	8.29902
ASPM	11.6511	11.4304	11.3398
ASPN	7.97883	8.09544	7.68197
ASPRV1	6.78227	6.40625	6.07106
ASPSCR1	10.8844	11.02	10.829
ASRGL1	9.0507	9.04463	8.46792
ASS1	13.8001	13.2449	13.3493
ASTE1	9.45193	9.46189	9.3757
ASTL	2.85643	2.78326	2.65038
ASTN1	2.67945	2.62094	2.79124
ASTN2	6.91245	7.38845	7.30784
ASUN	10.771	10.642	10.5582
ASXL1	11.9404	11.9581	11.9259
ASXL2	11.2144	11.0976	11.0161
ASXL3	3.58468	3.45591	3.52066
ASZ1	0.254366	0.237844	0.284165
ATAD1	11.3561	11.1559	11.0646
ATAD2	12.4056	12.3808	12.2578
ATAD2B	10.1227	10.0399	9.99173
ATAD3A	11.2727	11.1802	11.1327
ATAD3B	11.0664	10.9966	10.8818
ATAD3C	7.78354	7.55919	7.07093
ATAD5	9.77978	9.71834	9.53496
ATAT1	9.44734	9.51518	9.43325
ATCAY	1.49758	1.5838	1.56159
ATE1	10.5889	10.4388	10.3414
ATF1	10.4461	10.4382	10.2603
ATF2	11.0917	11.0332	10.9448
ATF3	11.7567	11.5288	11.6061
ATF4	14.0306	14.0913	13.9387
ATF5	11.4654	11.7179	11.6784
ATF6	11.8221	11.7339	11.6633
ATF6B	12.8909	12.802	12.7499
ATF7	10.8886	10.8599	10.7274
ATF7IP	11.7957	11.7828	11.9388
ATF7IP2	8.9751	8.50416	8.76199
ATG10	8.87028	8.8997	8.94306
ATG101	10.8422	10.8929	10.6668
ATG12	11.128	11.0692	11.0538
ATG13	11.9863	11.8951	11.7474
ATG14	10.5042	10.4051	10.3075
ATG16L1	10.5823	10.6134	10.4583
ATG16L2	10.7617	10.3948	10.3632
ATG2A	11.1468	11.0533	10.988
ATG2B	10.6233	10.5052	10.4124
ATG3	11.853	11.8822	11.8133
ATG4A	9.82321	9.85407	9.84487
ATG4B	11.5081	11.6176	11.6631
ATG4C	9.27639	9.32217	9.36525
ATG4D	10.5034	10.5106	10.5941
ATG5	11.2251	11.2025	11.1371
ATG7	10.4825	10.3718	10.3458
ATG9A	12.0219	11.9713	12.0282
ATG9B	8.71254	8.70816	8.67603
ATHL1	12.2181	11.9696	11.8015
ATIC	11.9796	11.9511	11.8661
ATL1	7.39481	7.63865	7.67404
ATL2	11.7187	11.6307	11.6716
ATL3	12.5458	12.4534	12.3304
ATM	10.7201	10.6055	10.4699
ATMIN	11.8195	11.7783	11.5715
ATN1	12.9535	13.0959	13.0222
ATOH1	0.509059	0.659067	0.89873
ATOH7	2.4292	2.84857	3.0023
ATOH8	6.29221	6.3269	6.11872
ATOX1	11.1276	11.1866	11.0534
ATP10A	7.29864	7.31338	7.0792
ATP10B	7.9172	7.95456	8.75706
ATP10D	10.3664	10.1866	10.0784
ATP11A	11.3405	11.1371	10.9086
ATP11B	12.1746	12.1836	12.2102
ATP11C	9.95138	10.0587	10.0567
ATP12A	3.43492	3.79536	3.96996
ATP13A1	12.1228	12.0274	11.9308
ATP13A2	11.6456	11.7611	11.7191
ATP13A3	12.9307	12.9306	12.662
ATP13A4	5.73269	6.21075	5.66777
ATP13A5	3.56246	4.13805	3.37199
ATP1A1	15.5672	15.547	15.7936
ATP1A2	3.58658	3.46893	3.81031
ATP1A3	5.68627	5.75689	6.03111
ATP1A4	2.1806	2.11518	2.25965
ATP1B1	13.2671	13.4949	13.2955
ATP1B2	5.08235	5.05682	5.16655
ATP1B3	14.0118	13.9477	13.9792
ATP1B4	0.601345	0.495946	0.37136
ATP2A1	6.80802	6.87141	6.49241
ATP2A2	14.4952	14.3804	14.196
ATP2A3	10.6744	10.7763	10.4988
ATP2B1	11.4387	11.4736	11.0068
ATP2B2	3.46476	3.18037	3.52513
ATP2B3	1.72311	1.87759	2.15102
ATP2B4	13.0487	12.9432	13.0737
ATP2C1	13.0708	13.1775	13.0432
ATP2C2	9.60161	9.36131	8.92659
ATP4A	0.974132	1.24129	0.931941
ATP4B	1.40442	1.38997	1.6353
ATP5A1	14.4314	14.4342	14.3506
ATP5B	14.9441	14.9702	14.9287
ATP5C1	13.049	13.0586	13.0314
ATP5D	11.7028	11.6616	11.6625
ATP5E	13.5809	13.7562	13.6259
ATP5EP2	4.40241	4.55343	4.36636
ATP5F1	12.9431	12.88	12.9476
ATP5G1	12.222	12.2136	12.0695
ATP5G2	13.7224	13.7674	13.5727
ATP5G3	13.2942	13.3197	13.2968
ATP5H	12.9463	12.9328	12.693
ATP5I	12.1656	12.3879	12.2651
ATP5J	12.1625	12.1652	12.1189
ATP5J2	12.4887	12.6405	12.5662
ATP5J2-PTCD1	2.63837	2.78493	2.79833
ATP5L	12.7636	12.7795	12.6609
ATP5L2	1.30135	1.20049	0.988447
ATP5O	12.15	12.2178	12.2002
ATP5S	10.2603	10.1755	10.0333
ATP5SL	11.1241	11.2363	11.1203
ATP6AP1	13.0897	13.1875	13.1419
ATP6AP1L	7.28479	7.44492	7.7372
ATP6AP2	13.0249	13.1183	13.0467
ATP6V0A1	11.3744	11.422	11.4293
ATP6V0A2	10.3596	10.2191	10.0409
ATP6V0A4	4.68497	4.85071	4.41738
ATP6V0B	12.8414	12.909	12.8503
ATP6V0C	11.0707	10.9442	10.9704
ATP6V0D1	12.5138	12.4995	12.3691
ATP6V0D2	4.24126	3.87193	4.11849
ATP6V0E1	12.9922	12.9685	13.0044
ATP6V0E2	9.56544	10.1928	10.3296
ATP6V1A	12.3311	12.3619	12.3361
ATP6V1B1	7.64428	7.56953	7.49607
ATP6V1B2	12.191	12.28	12.2453
ATP6V1C1	11.4917	11.5195	11.5092
ATP6V1C2	8.39883	8.27156	7.81813
ATP6V1D	12.0385	11.8603	11.6507
ATP6V1E1	12.5722	12.5943	12.4947
ATP6V1E2	7.8852	8.0561	8.02316
ATP6V1F	12.3736	12.473	12.4688
ATP6V1G1	12.6011	12.5702	12.5295
ATP6V1G2	4.19538	4.4102	4.18413
ATP6V1G2-DDX39B	0.218647	0.223194	0.232422
ATP6V1G3	0.256844	0.25388	0.189271
ATP6V1H	11.3792	11.3732	11.3696
ATP7A	9.32753	9.53441	9.51034
ATP7B	8.02045	7.79242	7.72112
ATP8A1	8.43585	8.49683	8.47223
ATP8A2	4.50097	4.52517	4.14828
ATP8B1	11.7952	11.8511	11.8985
ATP8B2	9.35901	9.50547	9.28099
ATP8B3	7.43964	7.19532	6.57717
ATP8B4	6.96404	6.84854	6.66566
ATP9A	11.7048	11.8397	11.9833
ATP9B	9.78558	9.78379	9.68914
ATPAF1	11.3971	11.4814	11.3941
ATPAF2	9.6832	9.62243	9.56727
ATPIF1	12.5499	12.5946	12.4827
ATR	11.044	10.9987	11
ATRAID	12.4171	12.4818	12.3191
ATRIP	3.4025	3.00916	3.11859
ATRN	11.6931	11.7764	11.6909
ATRNL1	2.87906	3.62395	3.27188
ATRX	11.4971	11.5978	11.6002
ATXN1	10.5443	10.696	10.419
ATXN10	12.4107	12.4186	12.2225
ATXN1L	11.2572	11.1714	11.0833
ATXN2	10.7249	10.7375	10.6171
ATXN2L	12.8591	12.8063	12.8148
ATXN3	10.5326	10.4777	10.4242
ATXN3L	0.0372932	0.0126582	0.0151515
ATXN7	10.5816	10.4607	10.5593
ATXN7L1	8.50349	8.49294	8.55179
ATXN7L2	8.89247	8.80833	8.99702
ATXN7L3	12.1673	12.0855	12.0382
ATXN7L3B	12.162	12.2606	12.1883
AUH	9.18791	9.04795	9.14937
AUNIP	9.14061	9.03796	9.02403
AUP1	13.1963	13.1369	13.0332
AURKA	11.0325	11.0839	11.0102
AURKAIP1	12.4268	12.4294	12.2587
AURKB	11.4091	11.3104	11.1712
AURKC	5.47623	5.59124	5.46756
AUTS2	10.4917	10.8155	10.9187
AVEN	9.80219	9.74809	9.58091
AVIL	7.88639	7.82811	7.77565
AVL9	11.1853	11.1321	11.0764
AVP	0.197116	0.256774	0.311549
AVPI1	11.4307	10.9433	10.5121
AVPR1A	6.33931	6.31257	5.50357
AVPR1B	1.78304	1.16911	1.20062
AVPR2	4.73751	4.69227	4.3395
AWAT1	0.295021	0.357999	0.416815
AWAT2	0.593638	0.986346	0.834676
AXDND1	2.69873	2.74643	2.62412
AXIN1	11.7057	11.585	11.5364
AXIN2	7.48015	7.61222	7.42236
AXL	10.89	10.6216	10.2338
AZGP1	5.92107	5.9269	6.1625
AZI2	9.62741	9.55364	9.61576
AZIN1	12.814	12.7496	12.8016
AZIN2	7.26446	7.31705	7.57896
AZU1	1.95656	1.94967	1.73788
B2M	17.4009	17.1818	17.1058
B3GALNT1	9.48924	9.77979	9.56459
B3GALNT2	9.12867	9.01753	8.9669
B3GALT1	1.83774	2.1553	1.59179
B3GALT2	2.5914	2.70457	3.16019
B3GALT4	9.67387	9.77644	9.69529
B3GALT5	5.83468	6.07732	6.84849
B3GALT6	10.8525	10.8102	10.7164
B3GALTL	9.92003	9.96886	9.83327
B3GAT1	5.08164	5.12139	5.01007
B3GAT2	4.83243	4.77533	4.78894
B3GAT3	11.0989	11.1435	10.9546
B3GNT2	10.6105	10.7929	10.6124
B3GNT3	10.2354	9.95478	8.93416
B3GNT4	7.02001	6.81808	6.66794
B3GNT5	11.5371	11.5106	11.3861
B3GNT6	2.68127	2.23186	1.35764
B3GNT7	9.29985	9.02892	8.46267
B3GNT8	8.59111	8.49623	9.02951
B3GNT9	9.68719	9.8009	9.56745
B3GNTL1	8.49938	8.43353	8.2522
B4GALNT1	6.95668	7.47873	6.89717
B4GALNT2	4.6818	3.9365	3.59648
B4GALNT3	10.6717	10.9064	10.4878
B4GALNT4	7.71906	7.84797	7.76237
B4GALT1	14.2283	13.9599	13.4564
B4GALT2	11.9851	11.9646	11.853
B4GALT3	11.3847	11.4288	11.3378
B4GALT4	11.3163	11.4762	11.0442
B4GALT5	12.4126	12.4671	12.375
B4GALT6	7.26444	7.63071	7.32477
B4GALT7	10.4827	10.5727	10.5295
B4GAT1	9.4797	9.48593	9.55313
B9D1	8.61878	8.68184	8.48913
B9D2	8.63132	8.62216	8.35855
BAALC	6.0369	6.54792	6.85956
BAAT	2.00271	2.09671	2.12089
BABAM1	11.5565	11.6007	11.4721
BACE1	10.49	10.2824	10.0615
BACE2	12.4694	12.2568	12.0086
BACH1	11.5119	11.3469	11.2326
BACH2	6.89691	7.2863	6.91589
BAD	11.0311	10.9914	10.9626
BAG1	12.8925	12.6617	12.3716
BAG2	9.04591	9.05887	8.50854
BAG3	12.5498	12.3302	12.3502
BAG4	10.573	10.4897	10.4748
BAG5	11.7382	11.723	11.4714
BAG6	13.7571	13.6927	13.5964
BAGE5	0.0552993	0.0956112	0.0151515
BAHCC1	9.53864	9.49272	9.38039
BAHD1	10.8073	10.8661	10.8138
BAI1	5.45382	5.34309	5.76595
BAI2	7.90127	8.53796	8.31949
BAI3	1.63985	1.70677	1.71002
BAIAP2	12.533	12.1527	11.929
BAIAP2L1	12.0769	12.1994	12.0958
BAIAP2L2	9.08942	8.65733	8.66022
BAIAP3	7.97113	7.5725	7.40115
BAK1	11.4249	11.2842	11.2998
BAMBI	8.3173	8.83336	8.59002
BANF1	13.0004	12.9675	12.8155
BANF2	0.262554	0.26272	0.252451
BANK1	6.68813	6.71349	6.3932
BANP	9.67805	9.67515	9.55226
BAP1	12.165	12.1083	12.1371
BARD1	10.2416	10.2246	10.2163
BARHL1	0.516782	0.452387	0.401392
BARHL2	0.398393	0.297055	0.485225
BARX1	3.43989	3.97602	3.41978
BARX2	9.81157	9.12675	10.1973
BASP1	11.07	10.7169	10.2654
BATF	8.17692	8.31805	8.45459
BATF2	9.17222	8.86558	8.77175
BATF3	6.75832	6.95503	6.57237
BAX	12.0768	12.0857	11.9648
BAZ1A	12.0715	12.0011	11.8465
BAZ1B	12.5498	12.7231	12.6421
BAZ2A	12.5091	12.4741	12.3402
BAZ2B	10.5438	10.4887	10.4499
BBC3	9.50739	9.52971	9.45416
BBIP1	8.84411	8.84461	8.6605
BBOX1	6.51881	6.30794	6.64404
BBS1	6.50021	6.39358	6.42077
BBS10	9.3163	9.27045	9.24154
BBS12	7.39325	7.35335	7.37646
BBS2	10.2573	10.4971	10.3057
BBS4	9.61475	9.51184	9.31839
BBS5	7.37541	7.54568	7.81767
BBS7	9.4718	9.40775	9.41333
BBS9	9.11512	9.07523	9.1685
BBX	11.5231	11.5522	11.4669
BCAM	12.7684	12.8195	12.2596
BCAN	5.96478	5.64199	5.78757
BCAP29	11.5062	11.4824	11.3735
BCAP31	14.106	14.192	14.11
BCAR1	12.401	12.2658	11.7895
BCAR3	10.6452	10.3333	10.0745
BCAS1	7.79571	7.61966	7.59152
BCAS2	11.3307	11.3505	11.4314
BCAS3	10.335	10.4354	10.3265
BCAS4	8.95687	9.19798	9.07526
BCAT1	9.51902	8.98208	8.83978
BCAT2	11.3206	11.3176	11.2463
BCCIP	11.8346	11.6661	11.5628
BCDIN3D	8.16697	8.20191	7.9745
BCHE	3.65661	3.89067	4.09666
BCKDHA	7.91818	7.9351	7.94002
BCKDHB	9.48625	9.44516	9.49748
BCKDK	11.433	11.4151	11.2529
BCL10	10.9244	10.8041	10.8847
BCL11A	9.90892	9.59085	10.6981
BCL11B	8.63995	8.75396	8.97823
BCL2	8.88583	9.17925	9.11696
BCL2A1	7.75037	7.59955	7.52806
BCL2L1	12.5381	12.5897	12.343
BCL2L10	7.87727	7.37173	7.30043
BCL2L11	11.3887	11.2513	11.2834
BCL2L12	10.8885	10.8298	10.6708
BCL2L13	11.5663	11.4182	11.3931
BCL2L14	6.4539	6.32825	6.52912
BCL2L15	6.84902	6.45506	6.40989
BCL2L2	11.4359	11.3248	11.3531
BCL2L2-PABPN1	5.04896	4.82724	4.75062
BCL3	12.5162	12.3733	12.2539
BCL6	11.5972	11.8038	11.6451
BCL6B	8.25667	8.17767	7.80261
BCL7A	10.208	10.2372	10.0567
BCL7B	11.3907	11.5715	11.5462
BCL7C	11.7205	11.8063	11.6526
BCL9	10.5077	10.5112	10.5934
BCL9L	11.2581	10.9599	10.8271
BCLAF1	12.4606	12.4557	12.3351
BCO1	5.49079	5.56358	5.59125
BCO2	6.48795	6.06158	6.0356
BCOR	10.8367	10.8613	10.8931
BCORL1	9.76015	9.75724	9.69531
BCR	12.8239	12.6203	12.4097
BCS1L	10.3834	10.2977	10.433
BDH1	10.9322	11.173	11.2509
BDH2	10.185	10.1162	10.0694
BDKRB1	7.73557	7.14731	7.5326
BDKRB2	10.7575	10.3382	10.1467
BDNF	6.15761	5.92898	4.81367
BDP1	10.8175	10.7148	10.7435
BEAN1	4.84495	4.82454	4.63733
BECN1	11.4372	11.3027	11.3074
BECN1P1	1.29681	1.32931	1.41563
BEGAIN	5.90069	6.11618	5.86913
BEND2	0.390927	0.355062	0.431966
BEND3	8.86001	8.87665	8.74139
BEND4	2.35449	2.46936	2.40431
BEND5	4.48394	5.34324	5.29124
BEND6	6.5288	6.48431	6.2804
BEND7	7.58072	7.43639	7.60159
BEST1	6.33985	6.35524	6.21993
BEST2	3.02108	2.71689	3.07293
BEST3	1.95585	2.09822	1.72586
BEST4	5.71325	5.50445	5.13682
BET1	10.0323	10.1191	10.0902
BET1L	11.4046	11.2758	11.1983
BEX1	2.31211	2.31425	2.396
BEX2	7.17984	7.37905	8.06492
BEX4	9.1148	8.97755	9.3839
BEX5	4.21657	4.68564	5.03829
BFAR	11.6612	11.5842	11.4366
BFSP1	6.77823	7.08278	6.72121
BFSP2	2.40292	2.64207	2.54409
BGLAP	5.67385	5.59804	5.61826
BGN	13.0778	13.3258	13.1092
BHLHA15	4.00366	3.99538	3.63675
BHLHA9	0.206882	0.248511	0.293028
BHLHB9	8.04035	8.0807	8.27207
BHLHE22	5.19755	5.25564	5.32647
BHLHE23	0.0705882	0.124814	0.0757576
BHLHE40	14.2868	14.1069	14.3565
BHLHE41	9.11117	8.98598	9.36564
BHMG1	1.62672	1.42406	1.07695
BHMT	1.84856	2.49998	2.4495
BHMT2	4.44387	4.74639	4.44289
BICC1	7.83289	7.74926	7.06065
BICD1	9.61063	9.61655	9.37295
BICD2	12.4323	12.3098	12.2724
BID	10.8477	10.8959	10.9067
BIK	9.46894	9.25374	8.65899
BIN1	10.8684	10.7087	10.2776
BIN2	8.5552	8.34538	8.46668
BIN3	9.75674	9.63509	9.51923
BIRC2	12.0465	11.5163	11.1494
BIRC3	11.6099	10.9463	10.5281
BIRC5	12.1009	12.0888	11.9006
BIRC6	12.0601	11.9877	11.8667
BIRC7	4.51013	4.33368	4.22813
BIRC8	0.101	0.0443038	0.0694691
BIVM	9.66092	9.4571	9.40485
BIVM-ERCC5	0.308785	0.233701	0.236136
BLACE	0.554959	0.501687	0.473707
BLCAP	12.9257	12.9313	12.9298
BLID	0.0657054	0.174726	0.0503322
BLK	4.02165	3.92938	4.17516
BLM	10.0355	9.8613	9.54656
BLMH	10.9654	11.0165	11.0116
BLNK	9.68152	9.55023	9.70879
BLOC1S1	10.9206	11.036	10.8526
BLOC1S2	11.4954	11.3971	11.3878
BLOC1S3	10.0844	10.0646	10.0055
BLOC1S4	9.57561	9.53596	9.45649
BLOC1S5	9.51854	9.47763	9.44643
BLOC1S5-TXNDC5	3.33866	3.47734	2.98432
BLOC1S6	11.4119	11.3468	11.2229
BLVRA	11.2872	11.4082	11.2372
BLVRB	12.1706	12.1836	12.0435
BLZF1	10.7511	10.5562	10.5823
BMF	10.0751	10.272	10.0087
BMI1	10.6658	10.736	10.6733
BMP1	12.0008	11.7359	11.3154
BMP10	0.195117	0.20981	0.205833
BMP15	0.104787	0.100677	0.130968
BMP2	9.701	9.28889	9.40014
BMP2K	8.64758	8.54249	8.57388
BMP3	5.36722	5.34124	5.09199
BMP4	7.58976	7.56309	7.21962
BMP5	0.879752	1.3869	1.06603
BMP6	6.1673	6.25461	5.77912
BMP7	9.98979	10.1435	10.8875
BMP8A	4.8134	4.82719	4.51337
BMP8B	9.21243	9.22276	8.98045
BMPER	4.00692	3.89398	3.73273
BMPR1A	10.4733	10.3085	10.2302
BMPR1B	7.46079	7.20279	5.87787
BMPR2	11.7421	11.7386	11.7041
BMS1	11.9004	11.7793	11.638
BMX	4.0207	3.96028	3.83254
BNC1	9.89693	9.17723	9.40278
BNC2	6.80912	7.06457	6.70175
BNIP1	9.14616	9.16177	9.15453
BNIP2	11.76	11.704	11.5583
BNIP3	10.4662	10.6906	10.558
BNIP3L	12.0953	12.3146	12.1293
BNIPL	8.74107	8.8157	9.18711
BOC	7.82935	8.35667	8.20931
BOD1	11.0097	11.0131	11.0498
BOD1L1	11.0312	11.0182	10.9275
BOD1L2	0.177374	0.147607	0.121212
BOK	10.9184	10.584	10.7664
BOLA1	9.9611	10.0728	9.95855
BOLA2	0	0.0297496	0
BOLA2B	5.304	5.2327	5.12189
BOLA3	9.93972	9.96792	9.76319
BOLL	1.46264	1.51702	1.75951
BOP1	12.0464	11.9185	11.8651
BORA	9.20868	8.93744	8.83711
BPGM	10.6741	10.6744	10.5245
BPHL	9.44327	9.38429	9.35987
BPI	2.19387	2.16036	2.54112
BPIFA1	2.22137	1.52147	0.63886
BPIFA2	1.3719	1.30136	0.474491
BPIFA3	0.0823529	0.0822785	0.0694691
BPIFB1	7.72209	5.88044	3.19097
BPIFB2	1.69145	1.33422	0.671609
BPIFB3	0.355495	0.301614	0.387404
BPIFB4	2.09562	1.99086	1.69015
BPIFB6	0.22418	0.151572	0.214809
BPIFC	1.78599	1.82097	1.61403
BPNT1	11.1689	11.0879	11.1415
BPTF	11.7794	11.7057	11.5662
BPY2	0	0.00632911	0
BPY2B	0	0	0
BPY2C	0	0	0
BRAF	10.2645	10.3897	10.417
BRAP	10.6154	10.5838	10.459
BRAT1	11.708	11.6779	11.5962
BRCA1	11.0127	10.8977	10.7016
BRCA2	9.95765	9.80516	9.68414
BRCC3	11.0396	10.9558	10.9461
BRD1	11.3819	11.3081	11.2011
BRD2	13.9329	13.8784	13.8065
BRD3	10.8426	10.6979	10.5938
BRD4	12.7263	12.653	12.5452
BRD7	11.9495	12.0079	11.8578
BRD8	11.5685	11.4793	11.5268
BRD9	11.4034	11.3998	11.1619
BRDT	0.855836	1.22892	1.15546
BRE	10.9374	10.8523	10.7943
BRF1	11.0008	11.0271	10.8927
BRF2	8.59386	8.4919	8.51046
BRI3	11.6483	11.7823	11.7365
BRI3BP	11.4636	11.4849	11.2732
BRICD5	8.07825	8.15803	7.88973
BRINP1	3.88219	3.56902	3.54588
BRINP2	1.39395	1.41961	1.335
BRINP3	0.651502	1.05649	0.901549
BRIP1	10.3456	10.2381	9.99805
BRIX1	11.591	11.6252	11.4063
BRK1	12.7986	12.8147	12.7565
BRMS1	12.0474	11.9065	11.7651
BRMS1L	9.45904	9.49259	9.38002
BROX	11.8334	11.7724	11.7225
BRPF1	10.6469	10.5856	10.6536
BRPF3	10.8911	10.9632	10.8712
BRS3	0.781531	0.928644	0.757256
BRSK1	6.3813	6.79918	6.62467
BRSK2	4.79346	4.88742	4.91707
BRWD1	11.7106	11.5915	11.5842
BRWD3	10.548	10.4629	10.5109
BSCL2	8.75696	8.64704	8.54492
BSDC1	12.1592	12.1692	12.1708
BSG	15.1544	14.9877	14.9318
BSN	5.32744	5.35562	5.29625
BSND	1.5928	1.87417	1.48366
BSPH1	0.0352941	0.0126582	0.030303
BSPRY	9.95291	10.1495	9.8689
BST1	6.21638	6.2869	6.2966
BST2	13.8265	13.7141	13.5693
BSX	0.0941176	0.164176	0.169543
BTAF1	11.073	10.8654	10.8117
BTBD1	11.684	11.7029	11.501
BTBD10	11.1583	10.9421	10.9537
BTBD11	9.78192	9.16888	9.47026
BTBD16	4.33001	4.03381	3.64597
BTBD17	0.99621	0.807794	0.928269
BTBD18	1.82288	1.68906	1.45736
BTBD19	7.50985	7.35555	7.11522
BTBD2	12.3983	12.339	12.3032
BTBD3	11.2151	11.0351	10.6911
BTBD6	12.0805	12.0612	12.0094
BTBD7	11.2626	11.0871	10.8666
BTBD8	3.77995	3.91996	3.84285
BTBD9	9.6568	9.71056	9.82761
BTC	6.90833	7.12286	7.21958
BTD	9.41008	9.28337	9.28228
BTF3	14.5645	14.4525	14.373
BTF3L4	11.7929	11.8397	11.776
BTG1	13.0623	13.2129	13.1192
BTG2	12.4935	12.4486	12.5418
BTG3	11.6248	11.6583	11.6694
BTG4	1.07392	1.38343	0.900095
BTK	7.49277	7.50496	7.67713
BTLA	4.69793	4.70783	4.91601
BTN1A1	1.79621	1.94322	1.93782
BTN2A1	10.5487	10.5415	10.5346
BTN2A2	9.53584	9.53997	9.55451
BTN3A1	10.968	10.8247	11.0174
BTN3A2	11.5313	11.3422	11.5066
BTN3A3	10.7083	10.3094	10.5728
BTNL2	0.765247	0.789614	0.799398
BTNL3	1.00743	0.798427	0.753024
BTNL8	2.13035	2.08657	2.22259
BTNL9	7.14568	7.32474	7.55902
BTRC	10.4958	10.2239	10.2753
BUB1	11.0471	11.0112	10.8388
BUB1B	11.026	10.872	10.6562
BUB3	12.968	12.7756	12.6497
BUD13	10.3625	10.3004	10.1872
BUD31	11.368	11.4859	11.4038
BVES	6.99912	7.17347	6.48106
BYSL	10.681	10.5893	10.4196
BZRAP1	9.34247	9.52267	9.54558
BZW1	12.6437	12.5663	12.3303
BZW2	12.1346	11.984	11.9113
C10orf10	10.4342	10.4114	10.2362
C10orf105	2.69378	2.24976	2.28681
C10orf107	3.17226	2.87653	2.35807
C10orf11	7.78885	7.8916	7.65297
C10orf113	0.779656	0.947247	0.679472
C10orf120	0.117647	0.127658	0.0694691
C10orf128	7.36635	7.30521	7.22962
C10orf2	10.0524	9.81583	9.70875
C10orf32	9.49731	9.39931	9.45259
C10orf32-ASMT	0.0774701	0.0706957	0.0454545
C10orf35	9.06772	9.16415	9.27295
C10orf53	0.293784	0.18977	0.363292
C10orf54	11.6294	11.2969	11.3103
C10orf55	6.45478	6.0312	6.17184
C10orf62	0.670205	0.898822	0.724204
C10orf67	4.86398	4.28822	3.38311
C10orf71	0.407181	0.384195	0.297414
C10orf76	10.7391	10.5704	10.6155
C10orf82	1.50337	1.17997	1.3764
C10orf88	8.98211	8.84631	8.78827
C10orf90	1.13209	1.5063	1.20913
C10orf95	5.78246	5.22988	5.10172
C10orf99	8.4751	7.35316	8.34675
C11orf1	8.72403	8.67529	8.565
C11orf16	3.54259	3.32845	2.91251
C11orf21	5.72278	5.57376	5.72727
C11orf24	11.1199	11.0355	10.8152
C11orf30	10.2389	10.0925	9.97638
C11orf31	11.869	11.8513	11.5724
C11orf40	0.0823529	0.0896831	0.030303
C11orf42	2.17915	2.13683	2.03713
C11orf45	6.74746	6.65565	6.64214
C11orf49	10.1997	10.2242	10.2235
C11orf52	1.55473	1.69417	1.66837
C11orf53	5.32154	5.22477	5.63122
C11orf54	9.8438	9.73643	9.56431
C11orf57	10.526	10.3536	10.2693
C11orf58	12.5042	12.4019	12.343
C11orf63	6.93553	6.57348	6.29539
C11orf65	4.257	4.28178	4.15702
C11orf68	10.7749	10.7482	10.6588
C11orf70	6.72746	6.24608	5.89286
C11orf71	7.79345	7.91056	7.67025
C11orf73	10.6637	10.482	10.3417
C11orf74	8.56879	8.55421	8.48881
C11orf80	10.4236	10.3079	10.0809
C11orf84	10.653	10.6934	10.5738
C11orf85	6.01951	5.46741	4.76619
C11orf86	2.21346	1.85844	0.84998
C11orf87	1.59348	1.28915	1.37542
C11orf88	2.78818	2.56965	1.99055
C11orf91	2.91751	2.47728	2.35237
C11orf94	2.82945	2.74778	2.54404
C11orf95	9.44352	9.5004	9.5283
C11orf96	8.61933	8.76241	8.23452
C11orf97	0.887326	0.523747	0.545937
C11orf98	8.04918	7.89805	7.79874
C12orf10	11.0057	11.0073	10.8872
C12orf29	10.1362	10.0566	9.94499
C12orf4	10.0863	10.0688	10.0298
C12orf40	0.580488	0.480187	0.621398
C12orf42	1.82884	2.20685	2.03645
C12orf43	9.96318	9.89766	9.69304
C12orf45	9.18704	9.24187	9.01975
C12orf49	11.1797	11.1954	11.055
C12orf5	9.59908	9.55479	9.47243
C12orf50	1.04626	1.14512	0.752378
C12orf54	6.37	6.03331	6.45865
C12orf56	6.3782	6.34599	6.93476
C12orf57	11.338	11.5421	11.4058
C12orf60	6.11702	6.05422	5.86528
C12orf65	10.5501	10.654	10.5487
C12orf66	8.83405	8.73259	8.55067
C12orf71	2.0258	1.99516	1.97263
C12orf73	8.64895	8.77182	8.57269
C12orf74	3.24297	2.86199	2.89768
C12orf75	11.2469	10.9995	10.4019
C12orf76	8.98624	8.93714	8.8141
C14orf1	11.7055	11.7014	11.4864
C14orf105	2.12042	1.54619	1.50409
C14orf119	11.9205	11.7151	11.5467
C14orf132	8.86145	8.7868	8.72185
C14orf142	9.52972	9.46346	9.26702
C14orf159	10.9015	10.7003	10.6847
C14orf166	12.7678	12.7823	12.5785
C14orf169	10.0012	9.90237	9.66352
C14orf177	0.0470588	0.056962	0.0151515
C14orf178	1.06371	0.964035	0.866507
C14orf180	0.578339	0.617709	0.842797
C14orf2	11.9539	11.9906	11.7214
C14orf28	7.66746	7.64077	7.51576
C14orf37	6.18625	6.34628	6.5403
C14orf39	4.28972	4.37963	3.83811
C14orf79	9.30612	9.22691	9.00574
C14orf80	10.756	10.6389	10.2487
C14orf93	9.46102	9.40646	9.29069
C15orf26	3.02279	2.84453	2.42292
[truncated: 17,757 more rows]
